# Supplementary material
Source: Springer Nature journal article supplement (https://www.springermedizin.de/resource/supplementary/12935_2010_261_MOESM7_ESM.pdf/9540170)
Supplement: MOESM7 [file 9540170]

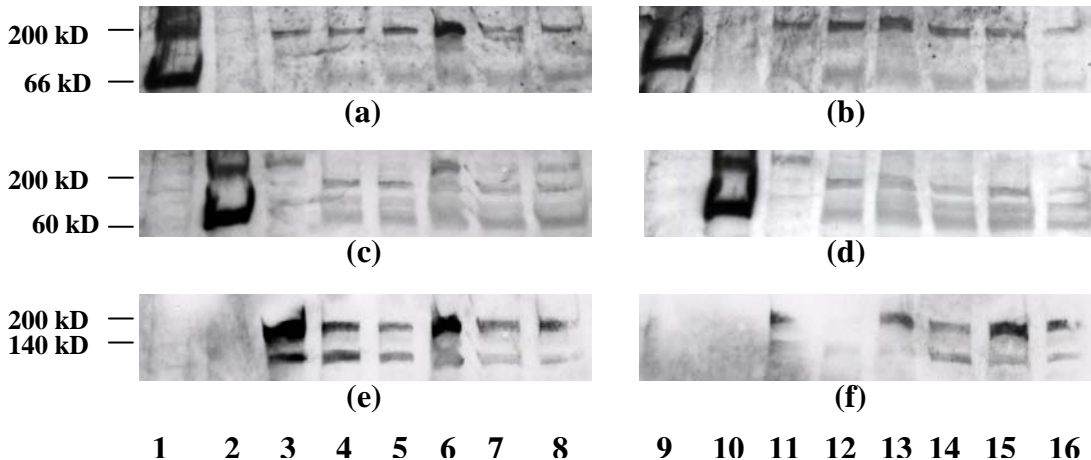

**Lanes:**

- 1 - Human Recombinant ER- $\alpha$  From Baculovirus-Infected Sf9 Cells**
- 2 - Human Recombinant ER- $\beta$  From Baculovirus-Infected Sf9 Cells**
- 3 - EGF-Stimulated A431 Total Cell Extracts (positive control for EGFR)**
- 4 - MCF-10A [+/+]**
- 5 - MCF-10A [-/- (#1)]**
- 6 - MCF-10A [-/- (#28)]**
- 7 - MCF-10A [-/+ (#2)]**
- 8 - MCF-10A [-/+ (#71)]**
- 9 - Human Recombinant ER- $\alpha$  From Baculovirus-Infected Sf9 Cells**
- 10 - Human Recombinant ER- $\beta$  From Baculovirus-Infected Sf9 Cells**
- 11 - EGF-Stimulated A431 Total Cell Extracts (positive control for EGFR)**
- 12 - MCF-10A [+/+] (Newly Acquired from ATCC)**
- 13 - MCF-10A [+/+] (Source #4)**
- 14 - MCF-10A [+/+] (Source #3)**
- 15 - MCF-10A [+/+] (Source #2)**
- 16 - MCF-10A [+/+] (Source #1)**
